# Supplementary material for: Effects of a self-efficacy-centred self-management program on neurogenic bladder after spinal cord injury: a randomized controlled trial
Source: Research Square preprint supplement (doi:10.21203/rs.3.rs-1900164/v1), 2022-08-08
Supplement: Supplementary file 1 [file 290131f96cd07ee4df9541a4.docx]

**Table 4** Statistical analysis results of between-group differences in the incidence of UTI, residual urine volume and bladder safety capacity of the participants after intervention

| Variables | | Control group  （*n* = 39）  *n*（%）/（±s） | Intervention group  （*n* = 40）  *n*（%）/（±s） | *χ2/ t* | *p* |
| --- | --- | --- | --- | --- | --- |
| UTI | Infected | 12（36.36%） | 4（11.76%） | 5.575a | 0.018 |
| Non-infected | 21（63.64%） | 30（88.24%） |
| Residual urine volume | | 219.23 ± 77.371 | 165.00 ± 56.285 | -3.555b | 0.001 |
| Bladder safety capacity | | 333.72 ± 100.922 | 392.25 ± 87.662 | 2.754b | 0.007 |

UTI: Urinary tract infection.

a: the chi-square test.

b: the independent samples t-test.
