# Supplementary material for: Effects of a self-efficacy-centred self-management program on neurogenic bladder after spinal cord injury: a randomized controlled trial
Source: Research Square preprint supplement (doi:10.21203/rs.3.rs-1900164/v1), 2022-08-08
Supplement: Supplementary file 2 [file 7ef75399f395bbd5d2a0ebc6.docx]

**Table 1** Baseline characteristics of the groups

| Variables | Control group  （*n* = 39） | Intervention group  （*n* = 40） | *t/χ2* | *p* |
| --- | --- | --- | --- | --- |
| *n*（%）/（±s） | *n*（%）/（±s） |
| Demographic information |  | | | |
| Sex |
| Male | 26（66.67） | 23（57.50） | 0.704a | 0.489 |
| Female | 13（33.33） | 17（42.50） |
| Age (years) | 51.05 ± 9.69 | 51.58 ± 12.82 | 0.205b | 0.838 |
| BMI | 24.67 ± 2.96 | 23.96 ± 3.13 | -1.027b | 0.307 |
| Marital status |  | | | |
| Divorced/Widowed | 3（7.69） | 5（12.50） | 2.530a | 0.262 |
| Unmarried | 1（2.57） | 4（10.00） |
| Married | 35（89.74） | 31（77.50） |
| Educational level |  | | | |
| Primary and below | 2（5.13） | 7（17.50） | 5.433a | 0.143 |
| Junior high | 28（71.79） | 20（50.00） |
| Senior high | 4（10.26） | 8（20.00） |
| Higher | 5（12.82） | 5（12.50） |
| Medical payment |  | | | |
| Private expense | 24（61.54） | 29（72.50） | 1.075a | 0.213 |
| Medical insurance | 15（38.46） | 11（27.50） |
| Disease-related information |  | | | |
| Aetiologies of injury |
| Traffic accidents | 10（25.64） | 14（35.00） | 2.584a | 0.643 |
| High falls | 8（20.51） | 6（15.00） |
| Falling objects | 6（15.39） | 3（7.50） |
| Low falls | 13（33.33） | 16（40.00） |
| Violence/Sports injuries | 2（5.13） | 1（2.50） |
| Level of injury |  | | | |
| Tetraplegia | 16（41.03） | 17（42.50） | 0.401a | 0.841 |
| Thoracic | 7（17.95） | 9（22.50） |
| Lumbar/Sacral | 16（41.02） | 14（35.00） |
| ASIA score |  | | | |
| B | 7（17.95） | 6（15.00） | 0.367a | 0.870 |
| C | 17（43.59） | 16（40.00） |
| D | 15（38.46） | 18（45.00） |

Abbreviations: BMI, Body Mass Index; ASIA, American Spinal Injury Association.

a: the chi-square test.

b: the independent Samples t-test.
