# Supplementary material for: Effects of a self-efficacy-centred self-management program on neurogenic bladder after spinal cord injury: a randomized controlled trial
Source: Research Square preprint supplement (doi:10.21203/rs.3.rs-1900164/v1), 2022-08-08
Supplement: Supplementary file 3 [file b2a3616f98e74424b0247f63.docx]

**Table 3** Statistical analysis results of between-group differences in self-management ability and SF-36 scores of the participants after intervention

| Variables | Control group  （*n* = 39）（±s） | Intervention group  （*n* = 40）（±s） | *t/Z* | *p* |
| --- | --- | --- | --- | --- |
| **Self-management ability** |  | | | |
| Knowledge | 6.05 ± 1.146 | 7.20 ± 0.853 | 5.062a | < 0.001 |
| Attitude | 6.62 ± 0.601 | 7.41 ± 0.499 | 6.315a | < 0.001 |
| Behaviour | 6.54 ± 0.521 | 7.32 ± 0.486 | 6.853a | < 0.001 |
| **SF-36** |  | | | |
| PF | 23.59 ± 19.800 | 24.50 ± 13.858 | -0.642b | 0.525 |
| RP | 18.59 ± 16.934 | 17.50 ± 17.172 | -0.312b | 0.800 |
| BP | 64.92 ± 18.575 | 72.15 ± 15.607 | -1.792b | 0.073 |
| GH | 53.77 ± 13.731 | 56.60 ± 10.604 | 1.027a | 0.308 |
| VT | 65.46 ± 12.697 | 71.25 ± 9.789 | -2.137b | 0.032 |
| SF | 46.79 ± 17.612 | 50.31 ± 20.508 | -0.976b | 0.332 |
| RE | 49.57 ± 26.351 | 59.17 ± 29.708 | -1.476b | 0.143 |
| MH | 64.31 ± 13.119 | 72.00 ± 11.314 | -2.737b | 0.006 |

PF: physical functioning, RP: role physical, BP: bodily pain, GH: general health, VT: vitality, SF: social functioning, RE: role emotional, MH: mental health.

a: the independent Samples t-test.

b: the Mann-Whitney U-test.
