# Supplementary material for: Effects of a self-efficacy-centred self-management program on neurogenic bladder after spinal cord injury: a randomized controlled trial
Source: Research Square preprint supplement (doi:10.21203/rs.3.rs-1900164/v1), 2022-08-08
Supplement: Supplementary file 4 [file ccacf7df3938dae8aa8ab3cd.docx]

**Table 2** Statistical analysis results of self-efficacy scores of participants at four assessment time points

|  | Pre-intervention | Post-4-weeks | Post-8-weeks | Post-12-weeks |
| --- | --- | --- | --- | --- |
| Control group | 2.35 ± 0.357 | 2.40 ± 0.283 | 2.48 ± 0.236 | 2.54 ± 0.247 |
| Intervention group | 2.36 ± 0.305 | 2.46 ± 0.247 | 2.56 ± 0.215 | 2.71 ± 0.218 |
| Mean difference  (95% CI) | 0.009  (-0.140, 0.157) | 0.060  (-0.059, 0179) | 0.083  (-0.018, 0.184) | 0.174  (0.070, 0.278) |
| *t* | 0.117 | 1.004 | 1.639 | 3.326 |
| *p* | 0.907 | 0.319 | 0.105 | 0.001 |
| *F between-group* (partial *η****2***) | 2.014 (0.025) | | | |
| *F time* (partial *η****2***) | 126.174*** (0.621) | | | |
| *F interaction* (partial *η****2***) | 11.420*** (0.129) | | | |

Mean difference 95% CI: Between-group comparisons; *F interaction*: *F between-group*time*.

Partial *η****2***: partial Eta squared.

*** *p* < 0.001.
